# Supplementary material for: Understanding of Active Sites and Interconversion of Pd and PdO during CH4 Oxidation
Source: MDPI journal article supplement (doi:10.3390/molecules28041957), 2023-02-18
Supplement: s1 [file s1]

## Understanding of Active Sites and Interconversion of Pd and PdO during CH<sub>4</sub> Oxidation

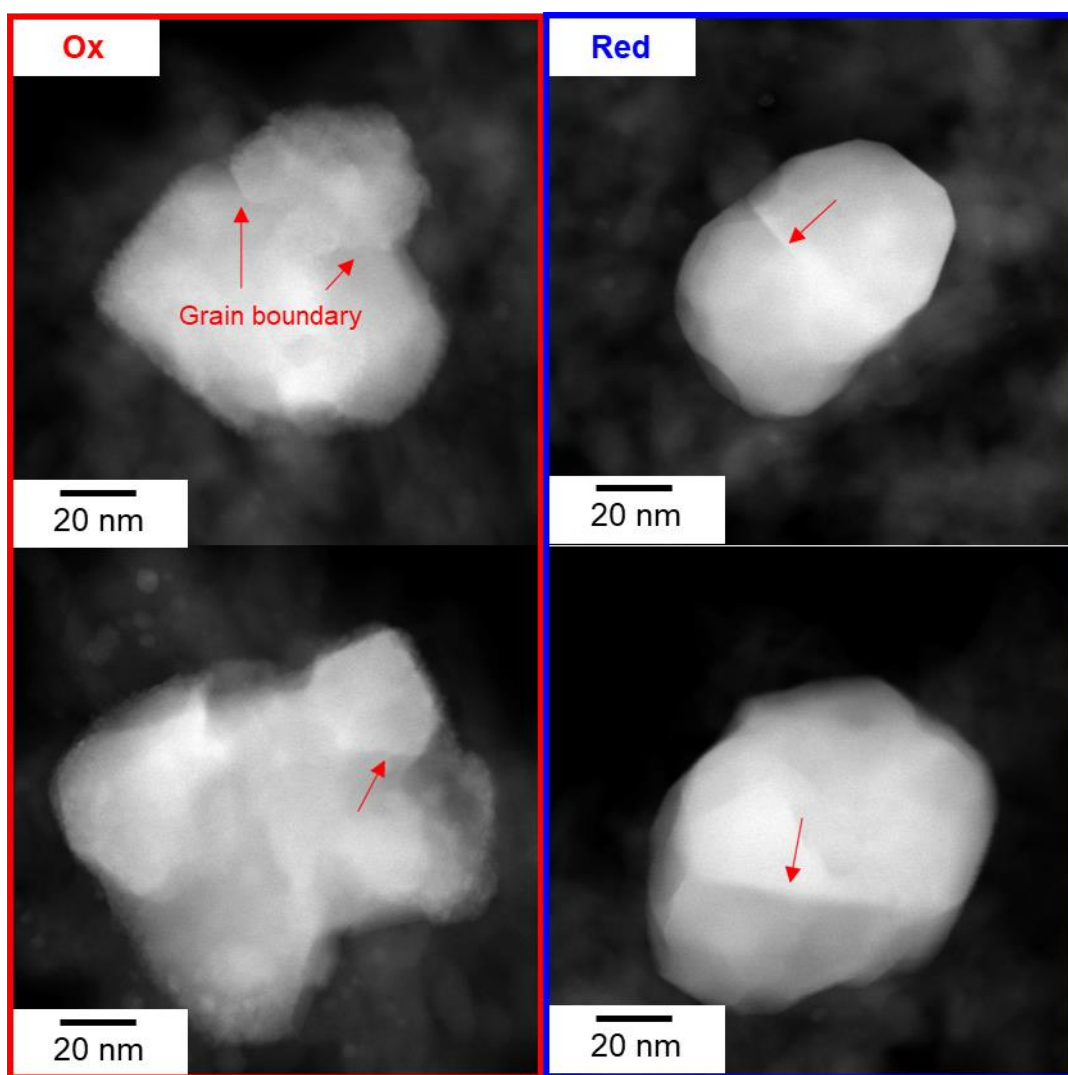

**Figure S1.** High magnification STEM images of Pd/Al<sub>2</sub>O<sub>3</sub>-Ox (red) and PdAl<sub>2</sub>O<sub>3</sub>-Red (blue).

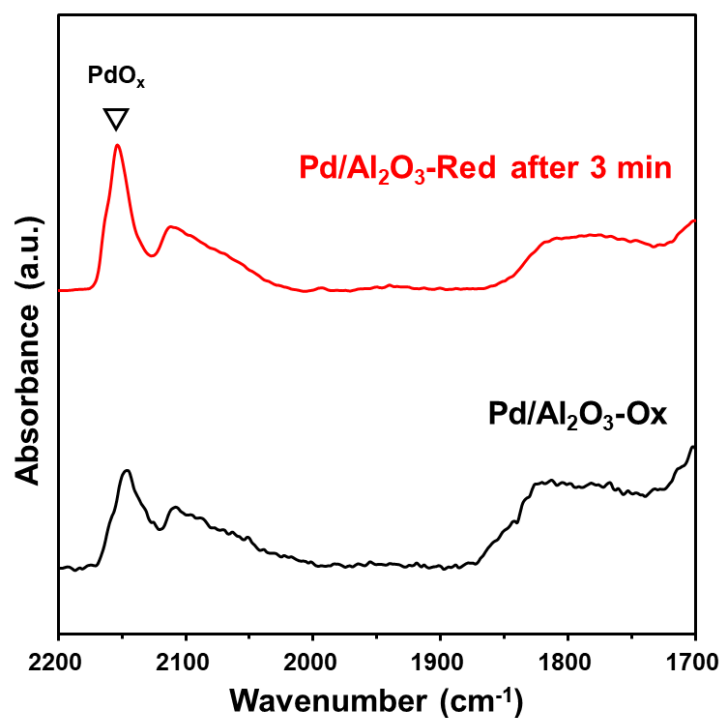

**Figure S2.** In-situ DRIFTS spectra of adsorbed CO on Pd/Al<sub>2</sub>O<sub>3</sub>-Ox (black) and Pd/Al<sub>2</sub>O<sub>3</sub>-Red after 3 min of CH<sub>4</sub> oxidation. DRIFTS spectra were recorded at 25 °C after He purging. The surface reconstruction from Pd to PdO immediately occurred within 3 min of the reaction. CH<sub>4</sub> oxidation condition – 1% CH<sub>4</sub>, 10% O<sub>2</sub> in He at 340 °C.
